# Supplementary material
Source: publisher figshare collection journal article supplement (https://springernature.figshare.com/ndownloader/files/34273013)
Supplement: Supplementary file 1 [file 34273013]

## Sheet: frosty icy plant
year(C.E.)	lunar month	area(province)					provinces and corresponding number				season	corresponding month
234	9	nan					Chinese	English	Number		Spring	3
235	7	nan					山東	Shandong	1		Summer	6
277	8	1					湖北	Hubai	2		Autumn	9
285	3	1					江蘇	Jiangsu	3		Winter	12
299	3	7					浙江	Zhejiang	4
504	3	nan					湖南	Hunan	5
536	8	15					貴州	Guizhu	6
578	8	nan					河南	Henan	7
679	8	9					江西	Jiangxi	8
679	8	10					陝西	Shaanxi	9
698	4	9					甘肅	Gansu	10
724	8	9					山西	Hshanxi	11
724	8	11					四川	Sichuan	12
813	10	7					福建	Fujian	13
819	4	1					安徽	Anhui	14
825	8	9					河北	Hebei	15
962	2	1					廣西	Guangxi	16
1270	4	17					遼寧	Liaoning	17
1292	3	1					北京	Beijing	18
1314	3	1					雲南	Yunnan	19
1393	4	11					青海	Qinghai	20
1466	4	15					廣東	Guangdong	21
1483	3	9					上海	Shanghai	22
1506	4	19
1509	10	13
1513	4	1
1532	11	21
1560	10	6
1584	3	1
1592	8	1
1615	8	1
1638	4	1
1639	4	10
1640	4	14
1642	4	7
1654	12	13
1664	4	1
1664	4	15
1675	4	1
1684	4	3
1698	7	11
1717	3	1
551	nan	nan
651	11	9
741	11	9
767	11	9
823	11	12
839	9	9
1466	11	18
1470	nan	4
1510	1	1
1511	1	1
1544	1	7
1560	12	14
1568	12	1
1604	10	1
1620	10	1
1641	1	8
1685	nan	7
1740	1	8
1798	12	14
1820	12	1

## Sheet: severe cold winter
year(C.E.)	lunar month	area(province)					provinces and corresponding number				season	corresponding month
183	12	1					Chinese	English	Number		Spring	3
403	12	nan					山東	Shandong	1		Summer	6
546	2	nan					湖北	Hubai	2		Autumn	9
562	1	nan					江蘇	Jiangsu	3		Winter	12
681	12	nan					浙江	Zhejiang	4
796	12	nan					湖南	Hunan	5
811	12	nan					貴州	Guizhu	6
821	2	3					河南	Henan	7
835	12	9					江西	Jiangxi	8
1017	12	7					陝西	Shaanxi	9
1054	1	7					甘肅	Gansu	10
1191	1	4					山西	Hshanxi	11
1191	2	13					四川	Sichuan	12
1325	12	14					福建	Fujian	13
1453	11	1					安徽	Anhui	14
1453	11	7					河北	Hebei	15
1453	11	4					廣西	Guangxi	16
1494	nan	8					遼寧	Liaoning	17
1501	12	13					北京	Beijing	18
1513	nan	8					雲南	Yunnan	19
1525	12	17					青海	Qinghai	20
1532	12	21					廣東	Guangdong	21
1566	12	2					上海	Shanghai	22
1578	12	1
1620	12	14
1621	1	2
1628	12	5
1636	11	13
1652	12	14
1654	12	15
1656	1	21
1664	12	15
1669	4	11
1670	12	8
1683	11	13
1686	12	21
1690	12	21
1690	12	14
1690	12	8
1690	12	7
1694	3	19
1714	12	8
1729	2	13
1758	1	21
1761	12	1
1790	12	14
1814	12	1

## Sheet: cool equinox summer
year(C.E.)	lunar month	area(province)					provinces and corresponding number				season	corresponding month
537	6	1					Chinese	English	Number		Spring	3
678	5	9					山東	Shandong	1		Summer	6
695	3	4					湖北	Hubai	2		Autumn	9
769	6	9					江蘇	Jiangsu	3		Winter	12
807	7	9					浙江	Zhejiang	4
988	5	1					湖南	Hunan	5
1129	6	nan					貴州	Guizhu	6
1166	1	4					河南	Henan	7
1166	1	3					江西	Jiangxi	8
1170	5	4					陝西	Shaanxi	9
1189	4	10					甘肅	Gansu	10
1200	5	nan					山西	Hshanxi	11
1213	6	nan					四川	Sichuan	12
1264	4	11					福建	Fujian	13
1367	5	11					安徽	Anhui	14
1381	6	4					河北	Hebei	15
1381	5	4					廣西	Guangxi	16
1449	5	4					遼寧	Liaoning	17
1477	4	17					北京	Beijing	18
1480	7	12					雲南	Yunnan	19
1480	8	12					青海	Qinghai	20
1495	4	11					廣東	Guangdong	21
1495	4	10					上海	Shanghai	22
1496	4	11
1498	6	19
1504	6	2
1506	4	19
1513	4	1
1527	4	5
1577	6	nan
1587	7	8
1601	6	4
1610	4	nan
1616	4	9
1624	6	3
1638	5	15
1653	6	8
1658	6	1
1660	6	14
1663	6	9
1667	6	4
1672	5	18
1691	5	6
1697	7	11
1705	6	4
1710	6	3
1719	7	18
1732	4	19
1743	7	14
1747	6	3
1763	5	11
1809	6	4
1821	6	1
277	8	1
306	8	nan
346	8	15
409	3	nan
521	3	nan
563	2	nan
659	2	nan
700	3	nan
705	3	4
803	3	nan
804	2	9
820	8	9
843	3	nan
893	2	1
903	3	4
904	9	9
992	3	9
1001	3	7
1007	7	10
1055	4	11
1056	1	7
1137	2	nan
1143	3	3
1165	2	4
1166	3	4
1189	7	10
1190	3	nan
1192	9	14
1261	7	11
1261	7	15
1306	3	14
1330	2	7
1343	3	10
1360	2	4
1367	2	19
1368	2	19
1453	2	14
1454	3	7
1454	2	8
1454	3	5
1454	2	4
1454	3	1
1502	9	3
1504	2	2
1504	3	21
1518	3	17
1523	3	1
1567	4	18
1591	3	1
1616	4	4
1621	3	5
1628	9	8
1641	3	14
1668	3	7
1679	8	11
1688	7	nan
1688	3	19
1713	1	21
1718	nan	8
1720	2	1
1721	3	3
1745	7	3
1755	7	10
1758	1	21
1762	7	10
1778	3	19
1787	7	4
1796	3	14

## Sheet: frozen well lake river
year(C.E.)	lunar month	area(province)					provinces and corresponding number				season	corresponding month
1132	12	3					Chinese	English	Number		Spring	3
1329	12	3					山東	Shandong	1		Summer	6
1454	3	3					湖北	Hubai	2		Autumn	9
1476	12	3					江蘇	Jiangsu	3		Winter	12
1513	12	3					浙江	Zhejiang	4
1580	12	3					湖南	Hunan	5
1654	12	3					貴州	Guizhu	6
1665	12	3					河南	Henan	7
1683	11	3					江西	Jiangxi	8
1700	11	3					陝西	Shaanxi	9
1482	12	5					甘肅	Gansu	10
1493	9	14					山西	Hshanxi	11
1511	12	1					四川	Sichuan	12
1513	12	5					福建	Fujian	13
1548	12	1					安徽	Anhui	14
1556	12	1					河北	Hebei	15
1670	12	14					廣西	Guangxi	16
1690	11	7					遼寧	Liaoning	17
1690	11	3					北京	Beijing	18
1720	3	3					雲南	Yunnan	19
1668	1	1					青海	Qinghai	20
1672	1	1					廣東	Guangdong	21
1773	1	1					上海	Shanghai	22
1804	1	1
515	12	14
985	12	8
1185	nan	nan
1513	11	8
1550	nan	14
1619	12	14
1664	nan	nan
1670	12	8
780	12	nan
931	11	1
952	12	7
971	11	7
982	nan	1
1012	1	1
1322	1	7
1326	2	7
1344	1	7
1344	1	1
1347	11	nan
1348	1	1
1375	1	7
1390	1	7
1449	1	1
1452	2	1
1453	1	nan
1494	2	1
1528	1	1
1597	1	nan
1722	1	7

## Sheet: harsh hot summer
year(C.E.)	lunar month	area(province)					provinces and corresponding number				season	corresponding month
798	6	nan					Chinese	English	Number		Spring	3
814	6	nan					山東	Shandong	1		Summer	6
1027	6	nan					湖北	Hubai	2		Autumn	9
1135	5	nan					江蘇	Jiangsu	3		Winter	12
1215	5	3					浙江	Zhejiang	4
1215	5	14					湖南	Hunan	5
1594	4	1					貴州	Guizhu	6
1743	5	18					河南	Henan	7
							江西	Jiangxi	8
							陝西	Shaanxi	9
							甘肅	Gansu	10
							山西	Hshanxi	11
							四川	Sichuan	12
							福建	Fujian	13
							安徽	Anhui	14
							河北	Hebei	15
							廣西	Guangxi	16
							遼寧	Liaoning	17
							北京	Beijing	18
							雲南	Yunnan	19
							青海	Qinghai	20
							廣東	Guangdong	21
							上海	Shanghai	22

## Sheet: warm equinox winter
year(C.E.)	lunar month	area(province)					provinces and corresponding number				season	corresponding month
557	3	nan					Chinese	English	Number		Spring	3
742	12	nan					山東	Shandong	1		Summer	6
822	12	9					湖北	Hubai	2		Autumn	9
880	11	9					江蘇	Jiangsu	3		Winter	12
1161	12	4					浙江	Zhejiang	4
1167	12	nan					湖南	Hunan	5
1200	12	4					貴州	Guizhu	6
1208	3	4					河南	Henan	7
1213	12	4					江西	Jiangxi	8
1221	3	nan					陝西	Shaanxi	9
1577	12	4					甘肅	Gansu	10
1612	1	8					山西	Hshanxi	11
1624	11	3					四川	Sichuan	12
1656	12	10					福建	Fujian	13
1702	12	1					安徽	Anhui	14
1704	2	8					河北	Hebei	15
1739	1	8					廣西	Guangxi	16
1739	1	14					遼寧	Liaoning	17
1815	2	4					北京	Beijing	18
							雲南	Yunnan	19
							青海	Qinghai	20
							廣東	Guangdong	21
							上海	Shanghai	22

## Sheet: torrential rain
year(C.E.)	lunar month	area(province)					provinces and corresponding number				season	corresponding month
227	9	nan					Chinese	English	Number		Spring	3
281	6	nan					山東	Shandong	1		Summer	6
326	10	4					湖北	Hubai	2		Autumn	9
564	6	1					江蘇	Jiangsu	3		Winter	12
656	9	4					浙江	Zhejiang	4
669	4	15					湖南	Hunan	5
682	7	7					貴州	Guizhu	6
786	5	9					河南	Henan	7
792	5	nan					江西	Jiangxi	8
792	7	15					陝西	Shaanxi	9
792	7	18					甘肅	Gansu	10
811	7	9					山西	Hshanxi	11
813	5	7					四川	Sichuan	12
824	7	1					福建	Fujian	13
830	6	1					安徽	Anhui	14
840	7	9					河北	Hebei	15
944	7	7					廣西	Guangxi	16
972	nan	7					遼寧	Liaoning	17
990	6	10					北京	Beijing	18
995	4	7					雲南	Yunnan	19
998	6	8					青海	Qinghai	20
1006	8	1					廣東	Guangdong	21
1010	5	7					上海	Shanghai	22
1026	6	15
1046	7	11
1048	7	7
1059	8	7
1061	7	4
1126	5	7
1131	nan	4
1151	6	2
1167	5	13
1199	5	4
1291	8	7
1303	6	17
1320	5	7
1321	4	8
1322	3	7
1322	3	9
1323	5	15
1324	7	10
1329	7	15
1333	6	18
1378	6	17
1380	7	21
1436	7	21
1457	nan	1
1478	6	1
1489	6	14
1523	6	1
1555	7	1
1556	nan	1
1558	7	10
1593	9	1
1596	nan	1
1603	9	1
1612	7	1
1648	6	1
1665	2	13
1679	9	11
1716	6	1
1719	6	1
1727	7	1
1732	6	1
1733	6	1
1738	9	15
1782	8	1
1789	8	1
1790	7	1
1812	6	1
1813	9	1
1818	5	1
1822	6	1
172	6	1
230	8	nan
320	4	nan
322	3	nan
329	3	3
508	7	nan
547	9	nan
623	9	9
656	8	9
704	9	9
705	1	9
714	5	9
728	9	9
760	4	9
769	4	9
771	8	9
794	3	9
825	6	9
856	4	9
1020	7	7
1028	7	nan
1064	7	7
1102	7	7
1124	9	7
1134	6	3
1134	6	4
1136	12	8
1167	8	nan
1170	11	4
1191	2	8
1193	4	nan
1210	3	4
1291	9	1
1303	6	4
1359	nan	5
1473	nan	1
1533	9	7
1537	2	7
1538	7	1
1572	6	1
1593	nan	1
1600	3	19
1607	nan	1
1613	7	1
1647	9	1
1648	6	1
1652	nan	1
1653	8	15
1658	6	1
1659	5	1
1662	9	11
1668	9	15
1687	7	1
1704	2	nan
1708	5	1
1773	6	1
1811	7	1
1821	6	1

## Sheet: heavy hail
year(C.E.)	lunar month	area(province)					provinces and corresponding number				season	corresponding month
279	6	7					Chinese	English	Number		Spring	3
293	4	7					山東	Shandong	1		Summer	6
293	6	9					湖北	Hubai	2		Autumn	9
349	6	15					江蘇	Jiangsu	3		Winter	12
657	5	15					浙江	Zhejiang	4
671	4	9					湖南	Hunan	5
682	5	15					貴州	Guizhu	6
703	8	9					河南	Henan	7
705	4	9					江西	Jiangxi	8
806	5	9					陝西	Shaanxi	9
817	6	7					甘肅	Gansu	10
840	6	7					山西	Hshanxi	11
965	4	7					四川	Sichuan	12
1003	4	7					福建	Fujian	13
1138	5	7					安徽	Anhui	14
1171	6	nan					河北	Hebei	15
1176	4	nan					廣西	Guangxi	16
1213	6	3					遼寧	Liaoning	17
1213	6	4					北京	Beijing	18
1216	4	4					雲南	Yunnan	19
1217	4	1					青海	Qinghai	20
1267	nan	nan					廣東	Guangdong	21
1325	8	nan					上海	Shanghai	22
1328	5	15
1330	7	15
1363	7	18
1438	7	10
1438	7	9
1438	7	17
1442	8	4
1454	6	15
1457	6	18
1472	7	10
1472	nan	8
1501	4	3
1505	6	1
1507	6	21
1508	nan	8
1513	nan	8
1513	5	7
1514	5	1
1516	4	1
1518	4	5
1520	4	8
1522	5	15
1526	nan	8
1530	5	17
1531	6	11
1534	6	1
1536	nan	11
1538	6	15
1540	9	nan
1544	5	1
1548	9	1
1549	9	1
1551	4	1
1558	nan	13
1565	nan	13
1566	7	13
1571	6	1
1574	5	1
1575	6	11
1576	4	1
1579	8	1
1583	nan	1
1593	7	11
1596	nan	11
1606	9	19
1612	8	8
1618	9	5
1620	8	1
1624	6	1
1626	5	1
1630	6	14
1631	5	11
1634	4	3
1637	4	11
1639	6	11
1642	6	9
1643	6	1
1648	5	n
1649	6	1
1650	nan	19
1652	5	1
1653	4	8
1665	8	1
1667	6	15
1675	5	1
1680	4	1
1680	7	11
1690	5	9
1691	nan	15
1693	5	1
1696	5	1
1702	4	1
1703	nan	3
1709	4	19
1715	nan	3
1733	8	1
1737	6	19
1743	7	19
1746	5	11
1750	4	8
1753	5	15
1757	5	17
1777	6	11
1794	4	6
1796	5	18
1800	5	1
1806	5	14
1807	8	15
318	3	12
988	3	15
1117	6	7
1150	10	4
1191	3	4
1191	2	13
1333	3	4
1461	2	nan
1484	3	8
1493	3	8
1495	2	4
1498	3	8
1502	3	21
1510	12	1
1550	3	8
1557	3	1
1566	2	21
1571	3	21
1574	3	21
1579	3	12
1584	1	5
1603	2	13
1615	2	6
1618	3	13
1635	3	21
1642	3	5
1644	1	13
1644	2	5
1645	2	5
1659	3	19
1668	2	8
1670	2	21
1671	1	21
1672	2	8
1673	3	13
1685	3	13
1687	3	14
1703	3	4
1736	3	12
1748	1	1
1755	3	2
1776	3	21
1806	2	21
1823	12	nan

## Sheet: heavy snow
year(C.E.)	lunar month	area(province)					provinces and corresponding number				season	corresponding month
15	nan	nan					Chinese	English	Number		Spring	3
241	1	nan					山東	Shandong	1		Summer	6
307	12	nan					湖北	Hubai	2		Autumn	9
396	12	nan					江蘇	Jiangsu	3		Winter	12
544	12	nan					浙江	Zhejiang	4
568	1	nan					湖南	Hunan	5
670	10	9					貴州	Guizhu	6
741	9	9					河南	Henan	7
742	nan	11					江西	Jiangxi	8
743	nan	11					陝西	Shaanxi	9
744	nan	11					甘肅	Gansu	10
745	nan	11					山西	Hshanxi	11
746	nan	11					四川	Sichuan	12
747	nan	11					福建	Fujian	13
748	nan	11					安徽	Anhui	14
749	nan	11					河北	Hebei	15
750	nan	11					廣西	Guangxi	16
751	nan	11					遼寧	Liaoning	17
752	nan	11					北京	Beijing	18
753	nan	11					雲南	Yunnan	19
754	nan	11					青海	Qinghai	20
755	nan	11					廣東	Guangdong	21
785	1	9					上海	Shanghai	22
786	1	9
831	1	9
832	1	9
864	12	11
903	3	4
904	12	4
1083	4	17
1087	12	7
1093	11	7
1117	12	7
1126	11	nan
1185	12	4
1190	12	13
1360	3	8
1445	nan	11
1450	1	4
1451	nan	14
1453	nan	1
1454	1	3
1460	3	14
1477	4	9
1477	5	10
1493	9	14
1493	10	3
1493	12	7
1494	nan	14
1507	12	1
1509	12	21
1523	12	8
1525	12	17
1531	1	11
1533	nan	13
1561	nan	14
1565	12	13
1568	nan	14
1569	9	21
1578	12	11
1597	12	8
1601	9	19
1614	nan	21
1620	12	14
1621	1	8
1624	12	11
1627	12	14
1633	1	6
1634	1	21
1643	12	10
1652	12	15
1653	12	8
1654	11	17
1656	1	21
1659	12	11
1666	1	13
1670	12	1
1671	12	14
1690	nan	3
1718	nan	14
1721	1	13
1725	11	19
1729	1	13
1782	12	19
1800	1	4
1800	1	14
1803	1	1
1812	1	15
1815	12	13
1818	12	15
1819	12	15

## Sheet: severe drought
year(C.E.)	lunar month	area(province)					provinces and corresponding number				season	corresponding month
108	6	7					Chinese	English	Number		Spring	3
109	nan	nan					山東	Shandong	1		Summer	6
176	nan	1					湖北	Hubai	2		Autumn	9
190	6	nan					江蘇	Jiangsu	3		Winter	12
203	nan	4					浙江	Zhejiang	4
228	nan	nan					湖南	Hunan	5
231	3	nan					貴州	Guizhu	6
255	nan	nan					河南	Henan	7
258	8	nan					江西	Jiangxi	8
271	5	nan					陝西	Shaanxi	9
273	1	nan					甘肅	Gansu	10
274	4	nan					山西	Hshanxi	11
276	5	nan					四川	Sichuan	12
285	3	nan					福建	Fujian	13
286	6	nan					安徽	Anhui	14
288	6	nan					河北	Hebei	15
297	7	nan					廣西	Guangxi	16
301	7	nan					遼寧	Liaoning	17
309	5	nan					北京	Beijing	18
322	6	nan					雲南	Yunnan	19
334	4	nan					青海	Qinghai	20
335	6	4					廣東	Guangdong	21
338	nan	4					上海	Shanghai	22
349	7	nan
366	6	4
367	6	4
368	6	4
369	6	4
370	6	4
372	10	nan
384	7	11
385	7	nan
402	9	nan
402	10	nan
414	9	nan
414	12	nan
463	nan	4
464	nan	4
502	nan	nan
516	nan	2
563	4	11
577	7	9
580	3	nan
584	nan	9
612	nan	nan
617	nan	nan
620	6	9
621	3	9
627	12	12
638	nan	nan
647	9	nan
648	9	12
650	nan	9
653	6	nan
660	nan	15
668	nan	1
668	nan	3
669	7	12
670	8	nan
680	nan	9
682	nan	9
706	12	1
706	12	15
706	12	7
724	7	15
724	9	11
728	nan	7
765	3	nan
769	nan	4
771	3	nan
782	5	nan
785	3	9
790	6	13
801	1	9
805	9	4
808	nan	5
808	nan	8
809	3	nan
809	6	nan
809	9	8
825	9	8
834	6	nan
835	9	7
846	3	nan
851	nan	4
884	nan	nan
900	12	9
930	nan	5
960	nan	1
962	3	15
968	nan	10
989	5	7
998	5	4
1004	6	7
1011	nan	15
1036	6	15
1049	nan	15
1064	3	nan
1073	3	4
1074	5	15
1074	5	9
1096	nan	nan
1102	nan	13
1102	nan	4
1108	6	8
1135	nan	4
1136	nan	12
1142	12	9
1164	nan	4
1171	3	8
1173	nan	4
1176	6	5
1180	3	5
1181	7	nan
1182	5	nan
1187	5	nan
1191	5	nan
1192	6	3
1193	6	12
1200	4	3
1205	6	4
1209	4	nan
1210	4	1
1215	3	4
1215	nan	14
1221	nan	4
1239	nan	4
1240	nan	4
1247	nan	4
1264	4	11
1275	nan	4
1295	6	10
1307	5	4
1320	6	14
1322	9	19
1324	7	6
1329	4	7
1329	1	10
1331	3	4
1369	8	10
1371	nan	9
1423	9	4
1428	nan	10
1433	3	7
1433	3	1
1442	12	7
1453	nan	19
1455	nan	1
1455	nan	11
1455	nan	7
1455	nan	9
1455	nan	8
1456	12	4
1458	nan	4
1462	nan	4
1466	5	10
1471	nan	3
1472	nan	nan
1477	nan	8
1484	nan	1
1485	nan	1
1499	6	13
1501	3	17
1502	nan	19
1503	1	1
1505	nan	11
1521	1	1
1521	1	7
1521	1	11
1521	1	9
1523	nan	1
1523	nan	7
1523	nan	8
1526	1	8
1527	3	7
1528	nan	10
1528	9	7
1543	nan	14
1544	nan	8
1544	nan	5
1549	nan	1
1558	nan	1
1560	1	7
1579	5	1
1580	nan	8
1580	nan	1
1582	nan	10
1583	8	11
1585	8	1
1586	nan	11
1588	5	1
1588	5	9
1588	5	4
1588	5	11
1588	6	20
1589	nan	8
1589	nan	4
1595	9	14
1599	nan	11
1602	nan	1
1615	3	15
1616	nan	10
1619	nan	14
1620	8	17
1628	6	15
1628	4	9
1633	6	11
1636	6	8
1640	nan	1
1640	3	11
1640	nan	15
1641	nan	1
1642	nan	7
1643	nan	21
1643	nan	5
1644	6	6
1646	6	8
1647	nan	3
1651	4	nan
1656	10	21
1657	nan	14
1661	nan	nan
1670	3	7
1678	nan	7
1678	nan	1
1679	nan	1
1688	12	3
1693	nan	14
1703	5	1
1705	3	13
1714	nan	15
1722	3	15
1722	nan	1
1732	nan	8
1742	3	21
1743	nan	1
1747	nan	nan
1761	nan	18
1769	6	5
1774	nan	1
1777	6	12
1778	nan	12
1786	nan	21
1801	3	1
1805	6	1
1825	5	1

[truncated: 9 more sheets: North-East flood, Yellow River, Haihe River, Yangtze River, Tibet Basin, Taihu Lake, SouthEast River, Pearl River, Huai River]
